# Supplementary material for: Isoflavones Mediate Dendritogenesis Mainly through Estrogen Receptor α
Source: MDPI journal article supplement (doi:10.3390/ijms24109011), 2023-05-19
Supplement: s1 [file s1]

**A. ER and GPER1 expression in Primary cerebellar culture after ER or GPER1 knockdown**

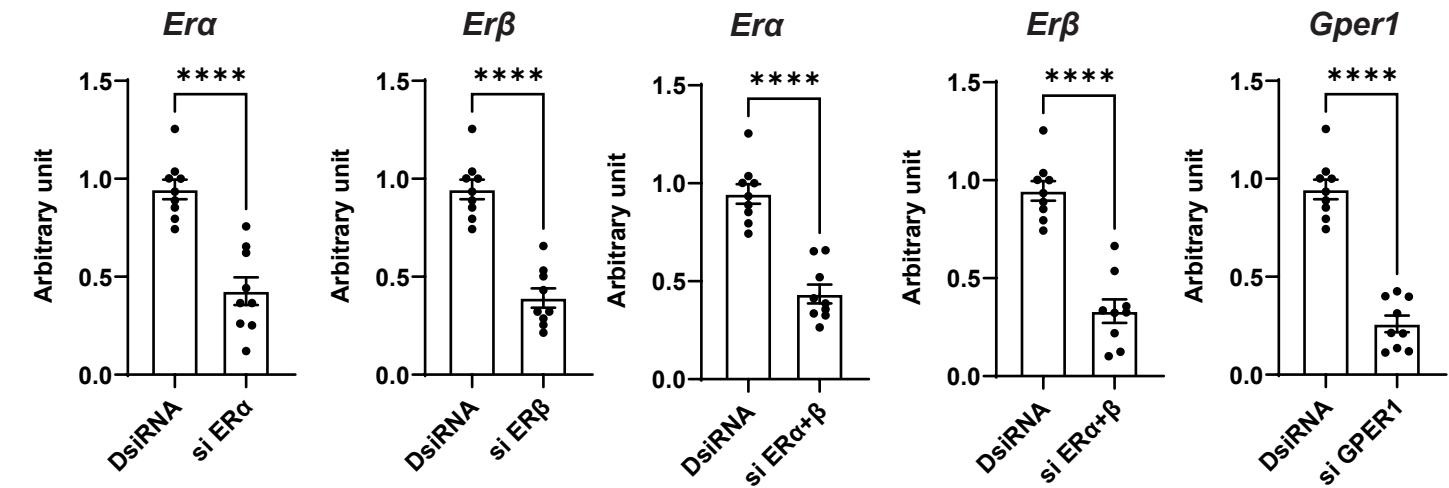

**B. ER and GPER1 expression in Neuro-2A cells after ER or GPER1 knockdown**

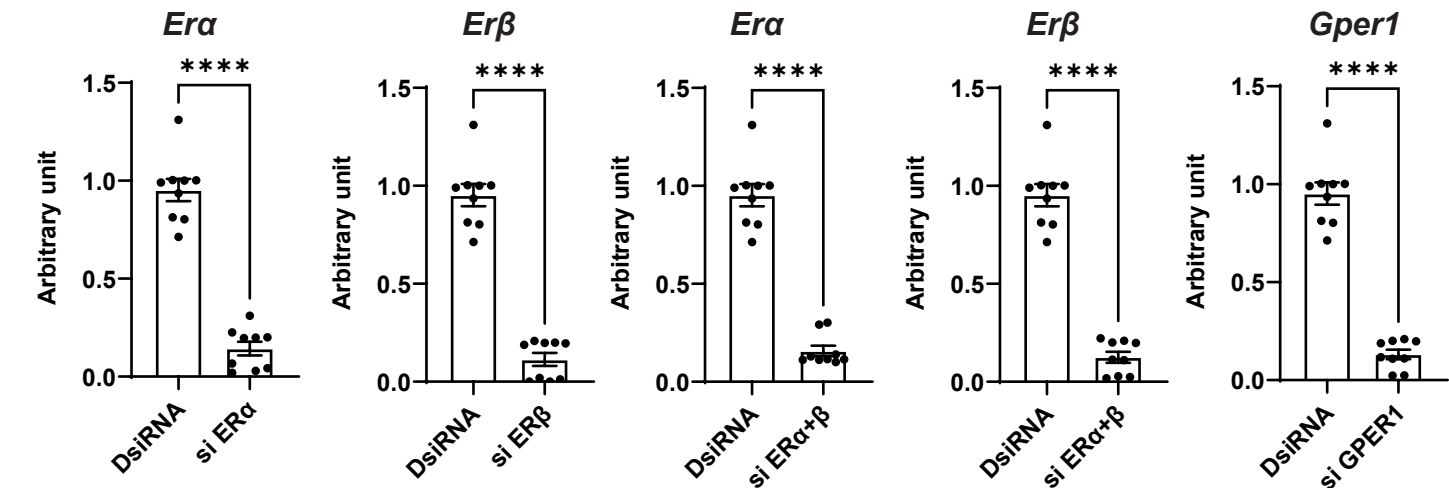

Supplementary Figure S1.
