# Supplementary material for: Isoflavones Mediate Dendritogenesis Mainly through Estrogen Receptor α
Source: MDPI journal article supplement (doi:10.3390/ijms24109011), 2023-05-19
Supplement: s1 [file s1]

### Supplementary Table.

Table S1. siRNA target sequences.

| Gene                | Sense                     | Antisense                  |
|---------------------|---------------------------|----------------------------|
| DsiRNA Controls     | CGUUAUUCGCGUAUAAUACGCGUAT | AUACGCGUAUUUACGCGAUUAACGAC |
| Er $\alpha$ (Mouse) | ACAGUUGACUUCAUAAGC        | UUCAGUAGCUUAUGAAGU         |
| Er $\beta$ (Mouse)  | CUAGGCAAGAACAUUACC        | AUCAGUUGGUAUUGUUCU         |
| GPFR (Mouse)        | GCAUCCUGGAUGGAAUUC        | UUCACUUCAAUCCAUC           |

Table S2. Primer sequences.

| Gene                                | Sense                  | Antisense              |
|-------------------------------------|------------------------|------------------------|
| <i>Era</i> (Mouse)                  | TGCGCAAGTGTTACGAAGTG   | TCTGACGCTTGTGCTTCAAC   |
| <i>Er<math>\beta</math></i> (Mouse) | AGGAATGGTCAAGTGTGGATCC | TGGCTTTGTTCAAGCAATGC   |
| <i>Gper</i> (Mouse)                 | TTCAACCTGGACGAGCAGTAC  | AGACGCTGCTGTACATGTTG   |
| <i>Bdnf</i> (Mouse)                 | ATCCAAAGGCCAACTGAAGC   | ATTGGGTAGTTCGGCATTGC   |
| <i>Camk2b</i> (Mouse)               | TGCAAGGAGGAAGCTCAAGG   | CTGTTTGTCTGGGGCTTGAC   |
| <i>Rbfox3</i> (Mouse)               | ACAGACAGACAACCAGCAAC   | CGAATTGCCCCGAACATTGTC  |
| <i>Tubb3</i> (Mouse)                | AGCTGTTCAAACGCATCTCG   | GACACCAGGTCATTCATGTTGC |
| <i>Syn1</i> (Mouse)                 | TGTGCGTGTCCAGAAGATTG   | ACATGGCAATCTGCTCAAGC   |
| <i>Dlg4</i> (Mouse)                 | GGTCAACGACAGCATCCTG    | ATGACGTAGAGGCGAACGATG  |
| <i>Syp</i> (Mouse)                  | TTTGCCATCTTCGCCTTTGC   | GGGTGCATCAAAGTACACTTGG |
| <i>Map2</i> (Mouse)                 | ATGAAGGAAAGGCACCACAC   | TGGAAATCCATTGGCGTTGC   |
| <i>Gapdh</i> (Mouse)                | TGCGACTTCAACAGCAACTC   | ATGTAGGCCATGAGGTCCAC   |
